# Supplementary material for: Phase-segregation free quasi-2D perovskite/organic tandem solar cells with low Voc loss and efficiency beyond 21%
Source: Royal Society of Chemistry journal article supplement (doi:10.1039/d3ta00052d), 2023-01-01
Supplement: d3ta00052d1.pdf [file d3ta00052d1.pdf]

## Supplementary Information

### Phase-segregation free Quasi-2D Perovskite/Organic Tandem Solar Cells with Low $V_{OC}$ Loss and Efficiency beyond 21%

Haotian Wu,<sup>a</sup> Tianyi Chen,<sup>a</sup> Yaokai Li,<sup>a</sup> Shitao Guan,<sup>a</sup> Lin Zhang,<sup>a</sup> Tingjun Chen,<sup>a</sup> Yang Liu,<sup>b</sup> Yizheng Jin,<sup>b</sup> Lijian Zuo,<sup>a</sup> Weifei Fu,<sup>\* a</sup> Gang Wu,<sup>\* a</sup> Hongzheng Chen,<sup>\* a</sup>

<sup>a</sup> MOE Key Laboratory of Macromolecular Synthesis and Functionalization, State Key Laboratory of Silicon Materials, Department of Polymer Science and Engineering, Zhejiang University, Hangzhou 310027, P. R. China

<sup>b</sup> Key Laboratory of Excited-State Materials of Zhejiang Province, State Key Laboratory of Silicon Materials, Department of Chemistry, Zhejiang University, Hangzhou, China

\* Corresponding Authors.

e-mail: [zjufwf@zju.edu.cn](mailto:zjufwf@zju.edu.cn); [wmang@zju.edu.cn](mailto:wmang@zju.edu.cn); [hzchen@zju.edu.cn](mailto:hzchen@zju.edu.cn)

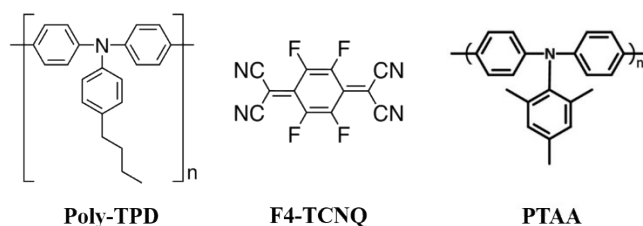

**Figure S1.** Schematic structure of Poly-TPD, F4-TCNQ and PTAA.

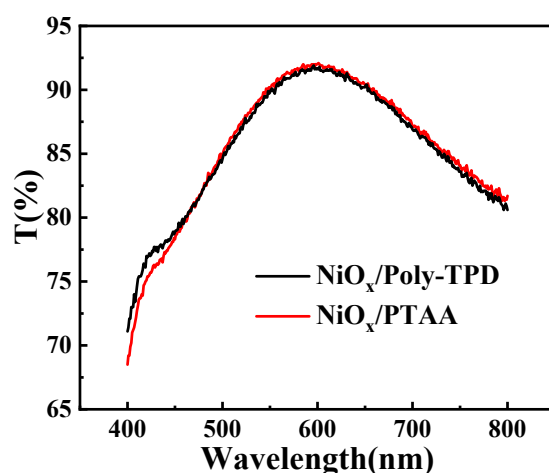

**Figure S2.** Transmission spectra of ITO glass coated by NiO<sub>x</sub>/PTAA or NiO<sub>x</sub>/Poly-TPD.

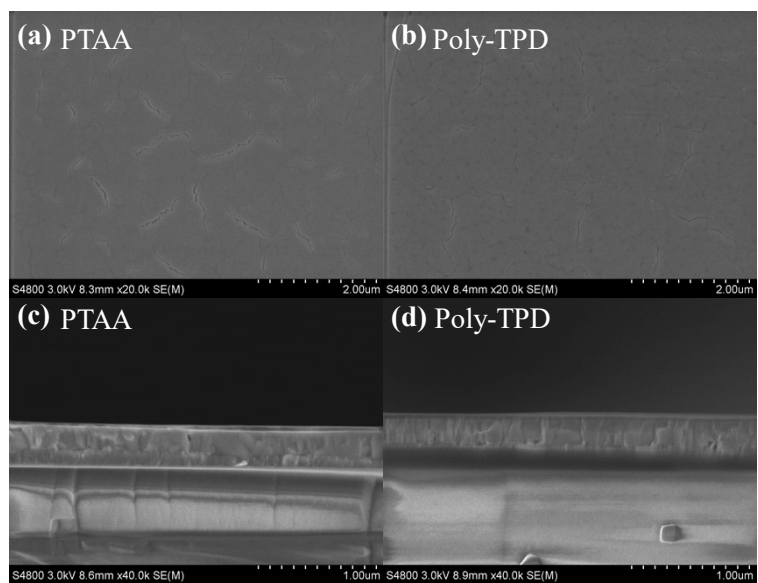

**Figure S3.** Top-view (a, b) and cross-sectional (c, d) SEM images of the  $\text{BA}_{1.8}\text{PEA}_{0.2}\text{MA}_3\text{Pb}_4\text{I}_{13}$  films deposited on different substrate.

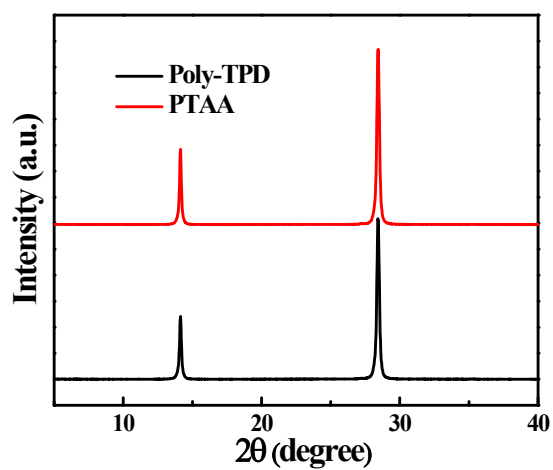

**Figure S4.** X-ray diffraction patterns of  $\text{BA}_{1.8}\text{PEA}_{0.2}\text{MA}_3\text{Pb}_4\text{I}_{13}$  films deposited on different substrate.

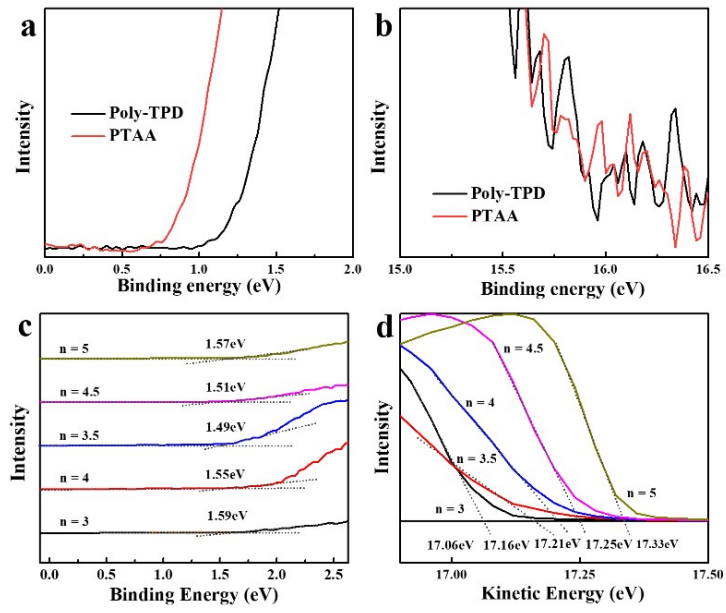

**Figure S5.** The UPS spectra of Poly-TPD, PTAA modified NiO<sub>x</sub> film (a), (b) and BA<sub>1.8</sub>PEA<sub>0.2</sub>MA<sub>n-1</sub>Pb<sub>n</sub>I<sub>3n+1</sub> film deposited on NiO<sub>x</sub>/Poly-TPD (c), (d).

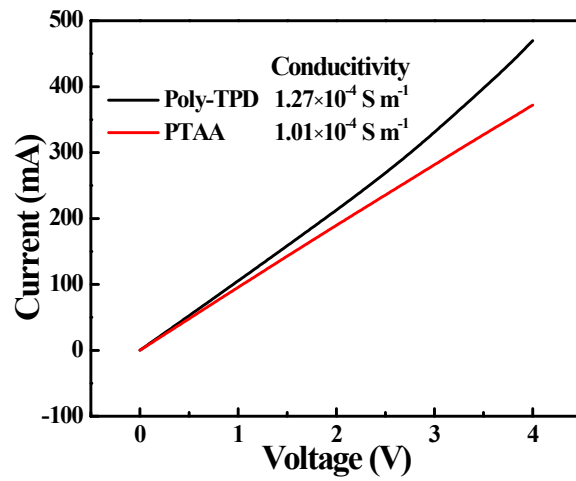

**Figure S6.** *I-V* curves of the devices with structure of ITO/modified NiO<sub>x</sub>/Au.

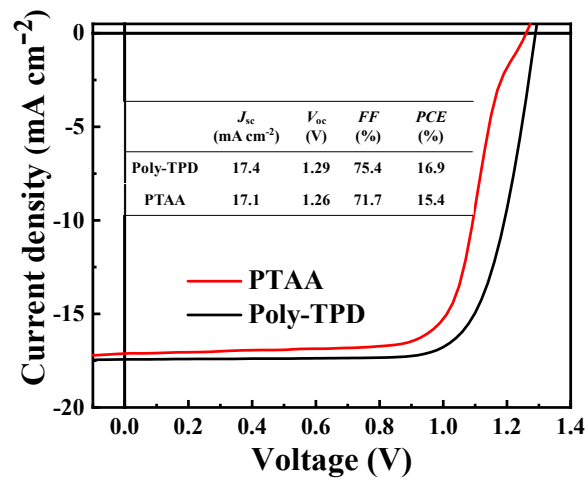

**Figure S7.**  $J$ - $V$  curves and photovoltaic parameters of the  $\text{BA}_{1.8}\text{PEA}_{0.2}\text{MA}_3\text{Pb}_4\text{I}_{13}$  PSC devices based on PTAA and Poly-TPD modified  $\text{NiO}_x$  under AM1.5G ( $100 \text{ mW cm}^{-2}$ ) illumination.

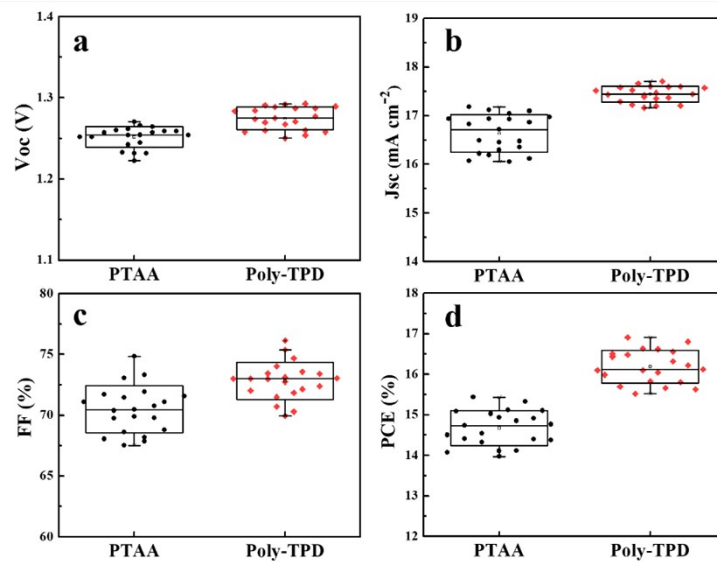

**Figure S8.** Distribution of  $V_{oc}$  (a),  $J_{sc}$  (b),  $FF$  (c) and  $PCE$  (d) for  $\text{BA}_{1.8}\text{PEA}_{0.2}\text{MA}_3\text{Pb}_4\text{I}_{13}$  PSC devices based on PTAA and Poly-TPD.

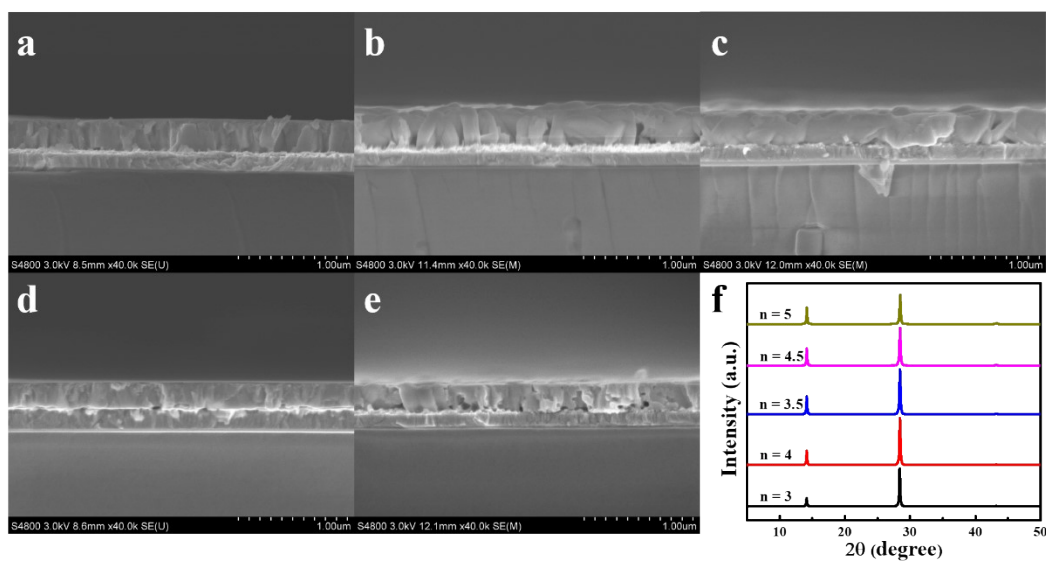

**Figure S9.** Cross-sectional SEM images and X-ray diffraction (XRD) patterns of  $\text{BA}_{1.8}\text{PEA}_{0.2}\text{MA}_{n-1}\text{Pb}_n\text{I}_{3n+1}$  films deposited on Poly-TPD.

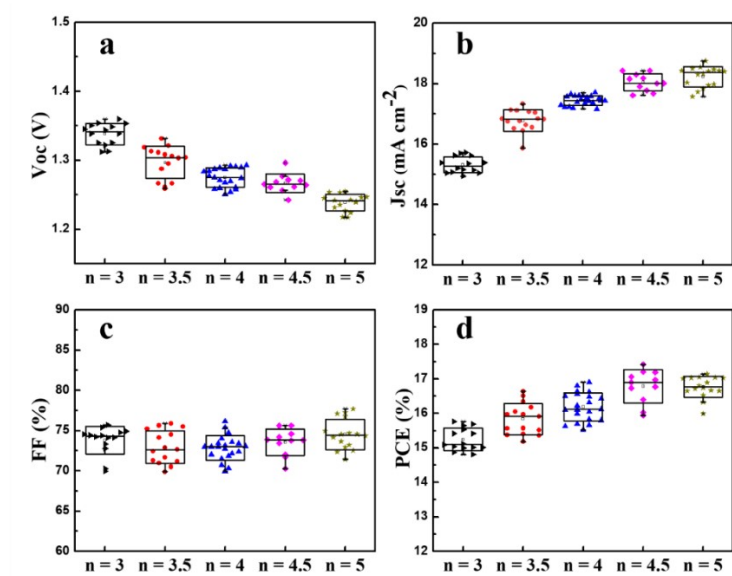

**Figure S10.** Distribution of  $V_{oc}$  (a),  $J_{sc}$  (b),  $FF$  (c) and  $PCE$  (d) for  $\text{BA}_{1.8}\text{PEA}_{0.2}\text{MA}_{n-1}\text{Pb}_n\text{I}_{3n+1}$  PSC devices deposited on Poly-TPD.

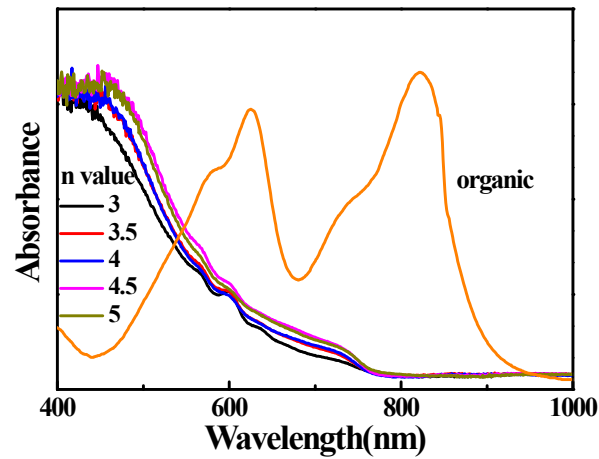

**Figure S11.** UV-Vis absorption spectra of  $\text{BA}_{1.8}\text{PEA}_{0.2}\text{MA}_{n-1}\text{Pb}_n\text{I}_{3n+1}$  and PM6:BTP-eC9 film.

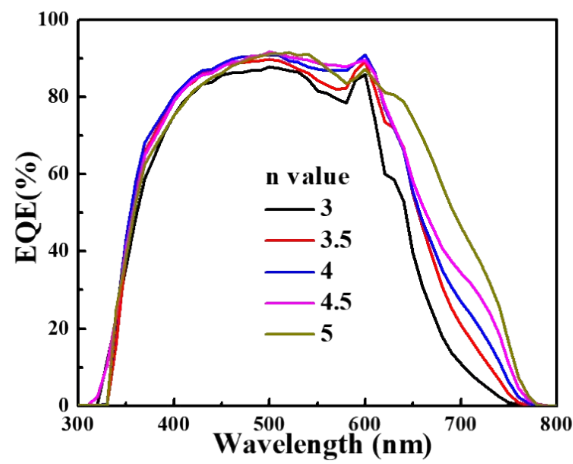

**Figure S12.** EQE spectra of  $\text{BA}_{1.8}\text{PEA}_{0.2}\text{MA}_{n-1}\text{Pb}_n\text{I}_{3n+1}$  PSC devices deposited on Poly-TPD.

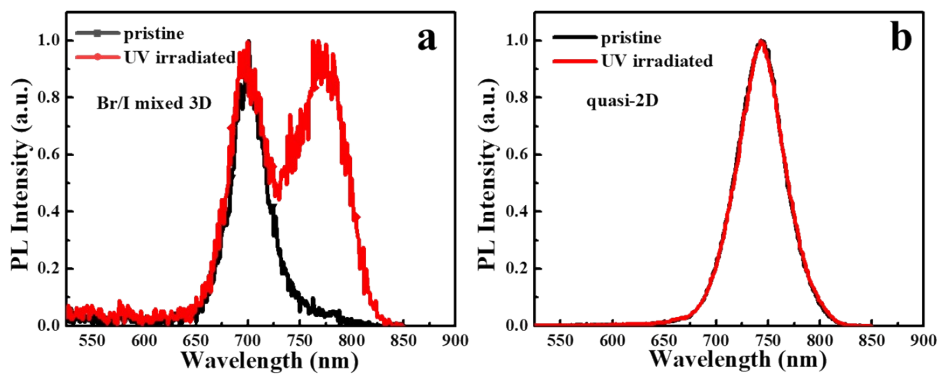

**Figure S13.** PL characteristics of the perovskite film before and after 470 nm UV irradiation. (a) Br/I mixed 3D perovskite under 15 min UV irradiation; (b) quasi-2D perovskite under 35 min UV irradiation.

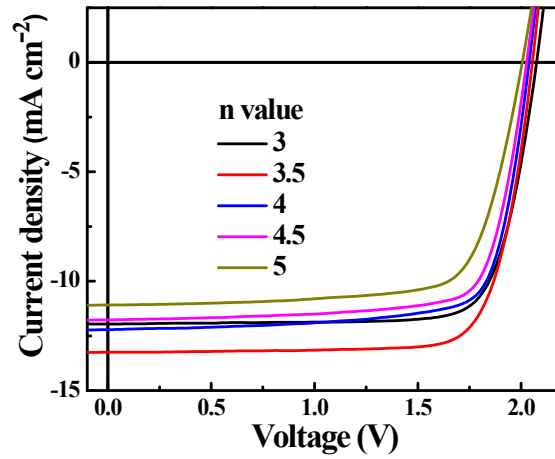

**Figure S14.**  $J$ - $V$  curves of quasi-2D perovskite/organic TSCs based on  $\text{BA}_{1.8}\text{PEA}_{0.2}\text{MA}_{n-1}\text{Pb}_n\text{I}_{3n+1}$  of different  $n$  value under AM1.5G ( $100 \text{ mW cm}^{-2}$ ) illumination.

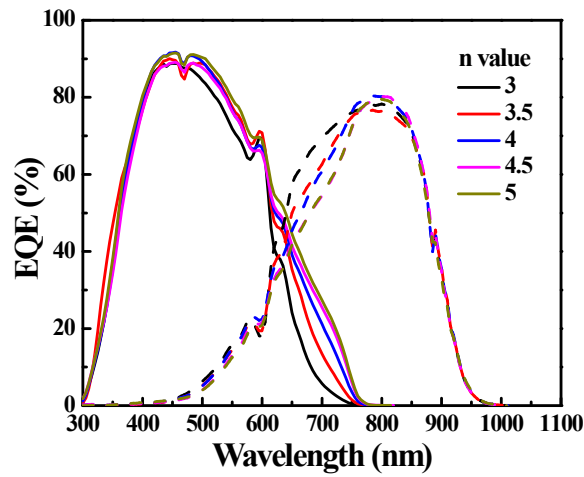

**Figure S15.** EQE curves of quasi-2D perovskite/organic TSCs based on  $\text{BA}_{1.8}\text{PEA}_{0.2}\text{MA}_{n-1}\text{Pb}_n\text{I}_{3n+1}$  of different  $n$  value under AM1.5G ( $100 \text{ mW cm}^{-2}$ ) illumination.

### Supplementary Text Note 1

Photovoltage estimation of  $V_{oc,limit}$ ,  $V_{oc}^{SQ}$ ,  $\Delta V_{oc}^{rad}$ :

$$V_{oc,limit} = V_{oc}^{SQ} - \Delta V_{oc}^{SQ} - \Delta V_{oc}^{rad} - \Delta V_{oc}^{nonrad}$$

$$V_{oc}^{SQ} = \frac{K_B T}{q} \ln \left( \frac{J_{SC}^{SQ}}{J_0^{SQ}} + 1 \right) ;$$

$$\Delta V_{oc}^{SQ} = \frac{K_B T}{q} \ln \left( \frac{J_{SC}^{SQ}}{J_{SC}} \right) ;$$

$$J_{SC}^{SQ} = q \int_{E_g}^{\infty} \phi_{AM1.5}(E) dE ;$$

$$J_0^{SQ} = q \int_{E_g}^{\infty} \phi_{bb}(E) dE ;$$

$$J_{SC} = q \int_0^{\infty} Q_e(E) \phi_{AM1.5}(E) dE ;$$

$$\phi_{bb}(E) = \frac{2\pi E^2}{h^3 c^2} \frac{1}{\exp\left(\frac{E}{K_B T}\right) + 1} \approx \frac{2\pi E^2}{h^3 c^2} \exp\left(-\frac{E}{K_B T}\right) ;$$

$$\Delta V_{oc}^{rad} = \frac{K_B T}{q} \ln\left(\frac{J_0^{rad}}{J_0^{SQ}}\right) ;$$

$$J_0^{rad} = q \int_0^{\infty} Q_e(E) \phi_{bb}(E) dE$$

$$\Delta V_{oc}^{nonrad} = \frac{K_B T}{e} \ln EQE_{EL}^{-1} ;$$

where  $q$ ,  $K_B$ ,  $h$ ,  $c$ ,  $E_g$  is the elementary charge, Boltzmann constant, Planck constant, light speed in the vacuum and the bandgap of perovskite, respectively.  $V_{oc}^{SQ}$  is the Shockley-Queisser limit of open circuit voltage,  $\Delta V_{oc}^{SQ}$  is the loss component related to non-ideal  $Q_e(E)$ .  $\Delta V_{oc}^{rad}$  is the  $V_{oc}$  loss related to the sub-bandgap radiative recombination. With the assumption of no sub-bandgap region is extended,  $Q_e(E)$  is given by the equation of:

$$Q_e(E) = \begin{cases} 0, & E < E_g \\ 0.9, & E \geq E_g \end{cases}$$

Then the  $\Delta V_{oc}^{rad}$  for all n-value perovskite was calculated to be 2.7meV.  $\Delta V_{oc}^{nonrad}$  is the  $V_{oc}$  loss resulted from non radiative recombination. The bandgap of different n value 2D perovskite could be obtained from the emission peak of the PL spectrum.  $\phi_{bb}(E)$ ,  $\phi_{AM1.5}(E)$  is solar cell radiative spectrum and black-body radiative spectrum,



respectively, which is shown in Figure S16.  $J_{SC}^{SQ}$ ,  $J_0^{SQ}$ , and  $J_0^{rad}$  is short-circuit current in S-Q limit, dark saturation current in S-Q limit and dark saturation current considering insufficient photon utilization and no extra EQE extending.

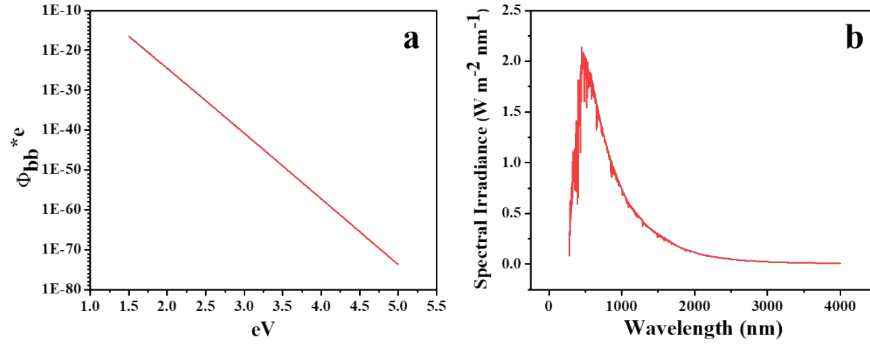

**Figure S16.** (a) The black body spectrum  $\phi_{BB}^{*e}$  at 300 K, (b) AM1.5G spectra.

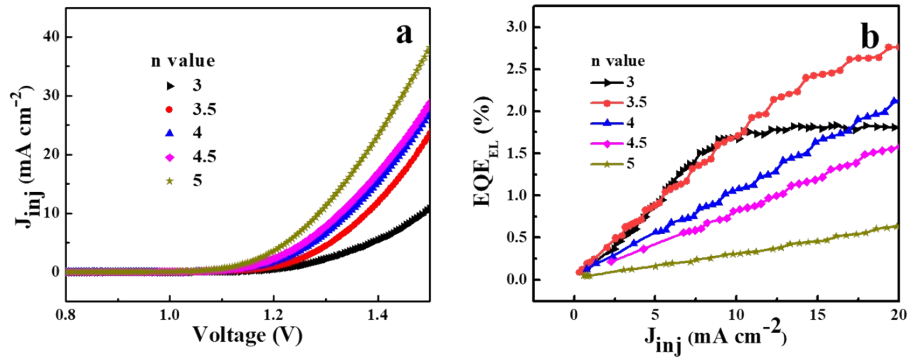

**Figure S17.** (a) Injection current of  $BA_{1.8}PEA_{0.2}MA_{n-1}Pb_nI_{3n+1}$  perovskite devices in light-emitting diode (LED) mode under different voltages. (b)  $EQE_{EL}$  values of the devices with various injection current.

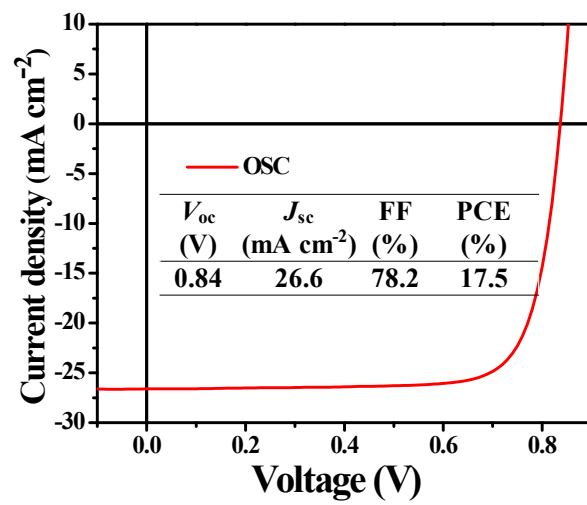

**Figure S18.** J-V curve and photovoltaic parameters of the OSC device.

**Table S1. Summary of the photovoltaic parameters of reported perovskite/organic TSCs.**

| Structure                                                                                                                                                                                                                                                  | Front Subcell       |                     |                          |         | PCE (%) | Stability                                               | Ref       |
|------------------------------------------------------------------------------------------------------------------------------------------------------------------------------------------------------------------------------------------------------------|---------------------|---------------------|--------------------------|---------|---------|---------------------------------------------------------|-----------|
|                                                                                                                                                                                                                                                            | E <sub>g</sub> (eV) | V <sub>oc</sub> (V) | V <sub>oc</sub> loss (V) | PCE (%) |         |                                                         |           |
| ITO/Poly-TPD/MA <sub>0.96</sub> FA <sub>0.1</sub> PbI <sub>2</sub> Br(SCN) <sub>0.12</sub> /PC <sub>61</sub> BM/BCP/Au/MoO <sub>3</sub> /PM6:CH1007/PFN-Br/Ag                                                                                              | 1.72                | 1.19                | 0.53                     | 17.4    | 21.2    | N <sub>2</sub> , unencapsulated<br>MPP: T90=75h         | 2         |
| ITO/2PACZ/FA <sub>0.6</sub> MA <sub>0.4</sub> Pb(I <sub>0.6</sub> Br <sub>0.4</sub> ) <sub>3</sub> /C <sub>60</sub> /BCP/Ag/MoO <sub>x</sub> /PTB7-Th:BTPV-4Cl-eC9/PDINN/Ag                                                                                | 1.79                | 1.25                | 0.54                     | 17.6    | 22.0    | N <sub>2</sub> , 25°C, UV light soaking<br>T85=720h     | 3         |
| ITO/SnO <sub>2</sub> /CsPbI <sub>1.8</sub> Br <sub>1.2</sub> /PBDB-T/MoO <sub>3</sub> /Au/ZnO/PFN/PM6:Y6/MoO <sub>3</sub> /Al                                                                                                                              | 1.94                | 1.22                | 0.72                     | 13.37   | 21.0    | N <sub>2</sub> , 25°C<br>MPP:<br>T91=1000h              | 4         |
| ITO/(NiO <sub>x</sub> /BPA)/Cs <sub>0.25</sub> FA <sub>0.75</sub> Pb(I <sub>0.6</sub> Br <sub>0.4</sub> ) <sub>3</sub> /C <sub>60</sub> /BCP/IZO/MoO <sub>3</sub> /PM6:Y6:PC <sub>71</sub> BM/PNDIT-F3N/Ag                                                 | 1.79                | 1.26                | 0.53                     | 17.8    | 23.6    | N <sub>2</sub> , capsulated,<br>MPP: T90=500h           | 5         |
| ITO/(NiO <sub>x</sub> /MeO-2PACZ)/FA <sub>0.8</sub> Cs <sub>0.2</sub> Pb(I <sub>0.5</sub> Br <sub>0.5</sub> ) <sub>3</sub> /PC <sub>61</sub> BM/AZO-NP/ALD-SnO <sub>x</sub> /ALD-InO <sub>x</sub> /MoO <sub>3</sub> /PM6:Y6:PC61BM/C <sub>60</sub> /BCP/Ag | 1.85                | 1.34                | 0.51                     | 16.8    | 24.0    | N <sub>2</sub><br>MPP: T80=100h                         | 6         |
| ITO/ZnO/SnO <sub>2</sub> /CsPbI <sub>2</sub> Br/PDCBT/MoO <sub>3</sub> /Ag/ZnO/PM6:Y6/MoO <sub>3</sub> /Ag                                                                                                                                                 | 1.9                 | 1.27                | 0.63                     | 14.5    | 18.4    | /                                                       | 7         |
| ITO/NiO <sub>x</sub> /FA <sub>0.8</sub> MA <sub>0.02</sub> Cs <sub>0.18</sub> PbI <sub>1.8</sub> Br <sub>1.2</sub> /C <sub>60</sub> /BCP/Ag/MoO <sub>3</sub> /PDBT-2F:Y6:PC <sub>71</sub> BM/TPBi/Ag                                                       | 1.77                | 1.11                | 0.66                     | 14.1    | 20.6    | N <sub>2</sub><br>MPP:<br>T100=100h                     | 8         |
| ITO/NiO <sub>x</sub> /Poly-TPD/BA <sub>1.8</sub> PEA <sub>0.2</sub> MA <sub>2.5</sub> Pb <sub>3.5</sub> I <sub>11.5</sub> /PC <sub>61</sub> BM/BCP/Au/MoO <sub>x</sub> /PM6:BTP-eC9/PFN/Ag                                                                 | 1.71                | 1.32                | 0.39                     | 16.6    | 21.3    | RH=50-80%,<br>ambient,<br>capsulation,<br>MPP: T90>500h | This work |

**Table S2. Photovoltaic parameters of reported quasi-2D PSCs.**

| Structure                                                                                                                                                    | $V_{oc}$<br>(V) | $J_{sc}$<br>(mA cm <sup>-2</sup> ) | $FF$<br>(%) | PCE<br>(%) | $E_g$<br>(eV) | $V_{oc}$ loss<br>(V) | Ref. |
|--------------------------------------------------------------------------------------------------------------------------------------------------------------|-----------------|------------------------------------|-------------|------------|---------------|----------------------|------|
| ITO/(NiO <sub>x</sub> /PTAA)/<br>(3AMP)(MA <sub>0.75</sub> FA <sub>0.25</sub> ) <sub>3</sub> Pb <sub>4</sub> I <sub>13</sub> /<br>PC <sub>61</sub> BM/BCP/Ag | 1.24            | 19.51                              | 77.27       | 18.67      | 1.59          | 0.35                 | 9    |
| ITO/PTAA/<br>AA <sub>2</sub> MA <sub>4</sub> Pb <sub>5</sub> I <sub>16</sub> /C <sub>60</sub> /BCP/Ag                                                        | 1.24            | 18.69                              | 79.13       | 18.34      | 1.65          | 0.41                 | 10   |
| ITO/PTAA/(4FPEA) <sub>2</sub> (MA) <sub>4</sub> P<br>b <sub>5</sub> I <sub>16</sub> /PC <sub>61</sub> BM/PEI/Ag                                              | 1.16            | 19.00                              | 78.98       | 17.34      | 1.61          | 0.45                 | 11   |
| ITO/PTAA/(PEA) <sub>2</sub> (MA) <sub>4</sub> Pb <sub>5</sub><br>I <sub>16</sub> /PC <sub>61</sub> BM/PEI/Ag                                                 | 1.22            | 17.91                              | 82.4        | 18.04      | 1.68          | 0.46                 | 12   |
| ITO/PEDOT:PSS/(ThMA) <sub>2</sub> (F<br>A) <sub>4</sub> Pb <sub>5</sub> I <sub>16</sub> /PC <sub>61</sub> BM/BCP/Ag                                          | 1.08            | 23.39                              | 75.8        | 19.06      | 1.50          | 0.42                 | 13   |
| ITO/PEDOT:PSS/(NpMA) <sub>2</sub> (<br>MA) <sub>3</sub> Pb <sub>4</sub> I <sub>13</sub> /PC <sub>61</sub> BM/BCP/Ag                                          | 1.24            | 20.89                              | 66.35       | 17.25      | 1.62          | 0.38                 | 14   |
| ITO/PTAA/(4FPEA) <sub>2</sub> (FA) <sub>4</sub> Pb<br><sub>5</sub> I <sub>16</sub> /PC <sub>61</sub> BM/BCP/Au                                               | 1.18            | 22.45                              | 79.53       | 21.07      | 1.54          | 0.36                 | 15   |
| ITO/PEDOT:PSS/(ThFA) <sub>2</sub> (M<br>A) <sub>2</sub> Pb <sub>3</sub> I <sub>10</sub> /PM6:Y6:PC <sub>61</sub> BM/B<br>CP/Ag                               | 1.12            | 23.07                              | 73.82       | 19.15      | 1.61          | 0.49                 | 16   |
| ITO/PTAA/(F-<br>PEA) <sub>2</sub> (MA) <sub>3</sub> Pb <sub>4</sub> I <sub>13</sub> /<br>PC <sub>61</sub> BM/PEI/Ag                                          | 1.21            | 19.04                              | 78.5        | 18.1       | 1.63          | 0.42                 | 17   |
| ITO/PEDOT:PSS/(PEA) <sub>2</sub> (MA<br>) <sub>3</sub> Pb <sub>4</sub> I <sub>13</sub> /PC <sub>61</sub> BM/BCP/Ag                                           | 1.20            | 18.52                              | 83.39       | 18.48      | 1.65          | 0.45                 | 18   |
| ITO/PTAA/AA <sub>2</sub> MA <sub>3</sub> Pb <sub>4</sub> I <sub>13</sub> /C <sub>6</sub><br><sub>0</sub> /BCP/Ag                                             | 1.24            | 18.57                              | 80.29       | 18.42      | 1.60          | 0.36                 | 19   |

**Table S3. Summary of the photovoltaic parameters for the  $\text{BA}_{1.8}\text{PEA}_{0.2}\text{MA}_n\text{-I}_3\text{Pb}_n\text{I}_{3n+1}$  PSC devices based on  $\text{NiO}_x/\text{poly-TPD}$  under AM1.5G ( $100 \text{ mW cm}^{-2}$ ) illumination.**

| n   | $V_{\text{oc}}$<br>(V) | $J_{\text{sc}}$<br>( $\text{mA cm}^{-2}$ ) | FF<br>(%) | $\text{PCE}_{\text{max/ave}}$<br>(%) | $V_{\text{oc loss}}$<br>(V) |
|-----|------------------------|--------------------------------------------|-----------|--------------------------------------|-----------------------------|
| 3   | 1.35                   | 15.2                                       | 75.4      | 15.4/14.4                            | 0.38                        |
| 3.5 | 1.32                   | 16.6                                       | 75.9      | 16.6/15.0                            | 0.39                        |
| 4   | 1.29                   | 17.4                                       | 75.4      | 16.9/16.2                            | 0.40                        |
| 4.5 | 1.27                   | 18.2                                       | 74.6      | 17.2/16.4                            | 0.41                        |
| 5   | 1.26                   | 18.3                                       | 74.7      | 17.1/16.4                            | 0.41                        |

**Table S4. Values of EQE<sub>EL</sub> and calculated  $\Delta V_{oc}^{nonrad}$ ,  $\Delta V_{oc}^{rad}$ ,  $\Delta V_{oc}^{SQ}$ ,  $V_{oc, limit}$  of the quasi-2D PSCs with different n value.**

| n value | EQE <sub>EL</sub><br>(%) | $V_{oc}^{SQ}$<br>(V) | $\Delta V_{oc}^{nonrad}$<br>(V) | $\Delta V_{oc}^{rad}$<br>(V) | $\Delta V_{oc}^{SQ}$<br>(V) | $V_{oc, limit}$<br>(V) |
|---------|--------------------------|----------------------|---------------------------------|------------------------------|-----------------------------|------------------------|
| 3       | 1.797                    | 1.45                 | 0.104                           | 0.0027                       | 0.006578                    | 1.34                   |
| 3.5     | 2.485                    | 1.42                 | 0.096                           | 0.0027                       | 0.005079                    | 1.32                   |
| 4       | 1.903                    | 1.41                 | 0.103                           | 0.0027                       | 0.004368                    | 1.30                   |
| 4.5     | 1.487                    | 1.40                 | 0.109                           | 0.0027                       | 0.003579                    | 1.28                   |
| 5       | 0.556                    | 1.39                 | 0.134                           | 0.0027                       | 0.003684                    | 1.25                   |

**Table S5. Photovoltaic parameters of the OSC device under AM1.5G (100 mW cm<sup>-2</sup>) illumination.**

| $V_{oc}$<br>(V) | $J_{sc}$<br>(mA cm <sup>-2</sup> ) | FF<br>(%) | PCE<br>(%) |
|-----------------|------------------------------------|-----------|------------|
| 0.84            | 26.6                               | 78.2      | 17.5       |

**Table S6. The highest calculated  $J_{sc}$  for quai-2D perovskite/organic TSCs with different n value and the corresponding thickness of the active layer for front/rear subcells.**

| n value | Film Thickness (nm) |            | $J_{sc}$<br>(mA cm <sup>-2</sup> ) |
|---------|---------------------|------------|------------------------------------|
|         | organic             | perovskite |                                    |
| 3       | 100                 | 460        | 14.8                               |
| 3.5     | 120                 | 420        | 15.4                               |
| 4       | 120                 | 340        | 15.4                               |
| 4.5     | 140                 | 300        | 15.3                               |
| 5       | 140                 | 260        | 15.3                               |

## Reference

1. Li, Z. *et al.* Organometallic-functionalized interfaces for highly efficient inverted perovskite solar cells. *Science* **376**, 416–420 (2022).
2. Xie, Y.-M. *et al.* Homogeneous Grain Boundary Passivation in Wide-Bandgap Perovskite Films Enables Fabrication of Monolithic Perovskite/Organic Tandem Solar Cells with over 21% Efficiency. *Adv. Funct. Mater.* **n/a**, 2112126 (2022).
3. Qin, S. *et al.* Constructing Monolithic Perovskite/Organic Tandem Solar Cell with Efficiency of 22.0% via Reduced Open-circuit Voltage Loss and Broadened Absorption Spectra. *Adv. Mater.* **n/a**, 2108829 (2022).
4. Chen, W. *et al.* Surface Reconstruction for Stable Monolithic All-Inorganic Perovskite/Organic Tandem Solar Cells with over 21% Efficiency. *Adv. Funct. Mater.* **32**, 2109321 (2022).
5. Chen, W. *et al.* Monolithic perovskite/organic tandem solar cells with 23.6% efficiency enabled by reduced voltage losses and optimized interconnecting layer. *Nat. Energy* 1–9 (2022) doi:10.1038/s41560-021-00966-8.
6. Brinkmann, K. O. *et al.* Perovskite–organic tandem solar cells with indium oxide interconnect. *Nature* **604**, 280–286 (2022).
7. Xie, S. *et al.* Efficient monolithic perovskite/organic tandem solar cells and their efficiency potential. *Nano Energy* **78**, 105238 (2020).
8. Chen, X. *et al.* Efficient and Reproducible Monolithic Perovskite/Organic Tandem Solar Cells with Low-Loss Interconnecting Layers. *Joule* **4**, 1594–1606 (2020).
9. Wu, H. *et al.* Merged interface construction toward ultra-low Voc loss in inverted two-dimensional Dion–Jacobson perovskite solar cells with efficiency over 18%. *J. Mater. Chem. A* (2021) doi:10.1039/d1ta02015c.
10. Li, K. *et al.* High Efficiency Perovskite Solar Cells Employing Quasi-2D Ruddlesden–Popper/Dion–Jacobson Heterojunctions. *Adv. Funct. Mater.* **n/a**, 2200024 (2022).
11. Shi, J. *et al.* Fluorinated Low-Dimensional Ruddlesden–Popper Perovskite Solar Cells with over 17% Power Conversion Efficiency and Improved Stability. *Adv. Mater.* **31**, 1901673 (2019).
12. Zhang, J. *et al.* Uniform Permutation of Quasi-2D Perovskites by Vacuum Poling for Efficient, High-Fill-Factor Solar Cells. *Joule* **3**, 3061–3071 (2019).
13. Lai, H. *et al.* Organic-Salt-Assisted Crystal Growth and Orientation of Quasi-2D Ruddlesden–Popper Perovskites for Solar Cells with Efficiency over 19%. *Adv. Mater.* **32**, 2001470 (2020).
14. Xu, Z. *et al.* Phase Distribution and Carrier Dynamics in Multiple-Ring Aromatic Spacer-Based Two-Dimensional Ruddlesden–Popper Perovskite Solar Cells. *ACS Nano* **14**, 4871–4881 (2020).
15. Shao, M. *et al.* Over 21% Efficiency Stable 2D Perovskite Solar Cells. *Adv. Mater.* **n/a**, 2107211 (2021).
16. Wang, T. *et al.* Integrated Quasi-2D Perovskite/Organic Solar Cells with Efficiency over 19% Promoted by Interface Passivation. *Adv. Funct. Mater.* **n/a**, 2107129 (2021).
17. Wang, Z. *et al.* Spacer Cation Tuning Enables Vertically Oriented and Graded Quasi-2D Perovskites for Efficient Solar Cells. *Adv. Funct. Mater.* **n/a**, 2008404 (2021).
18. Yang, Y. *et al.* Defect Suppression in Oriented 2D Perovskite Solar Cells with Efficiency over 18% via Rerouting Crystallization Pathway. *Adv. Energy Mater.* **11**, 2002966 (2021).
19. Wu, G. *et al.* Molecular Engineering for Two-Dimensional Perovskites with Photovoltaic Efficiency Exceeding 18%. *Matter* **4**, 582–599 (2021).
